# Supplementary material for: Platycodin D Suppresses Type 2 Porcine Reproductive and Respiratory Syndrome Virus In Primary and Established Cell Lines
Source: MDPI journal article supplement (doi:10.3390/v10110657), 2018-11-21
Supplement: s1 [file s1]

## Supplementary Materials:

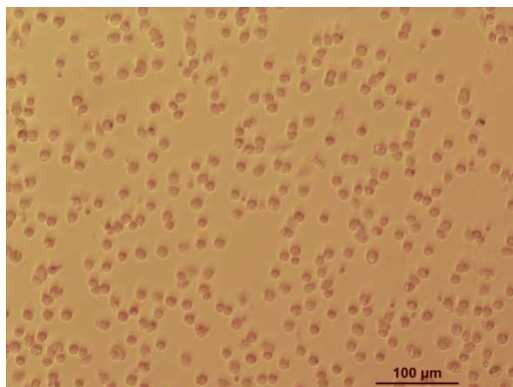

**Figure S1.** Micrographs of PAMs from bronch alveolar lung fluid of piglets at 2 h post incubation.

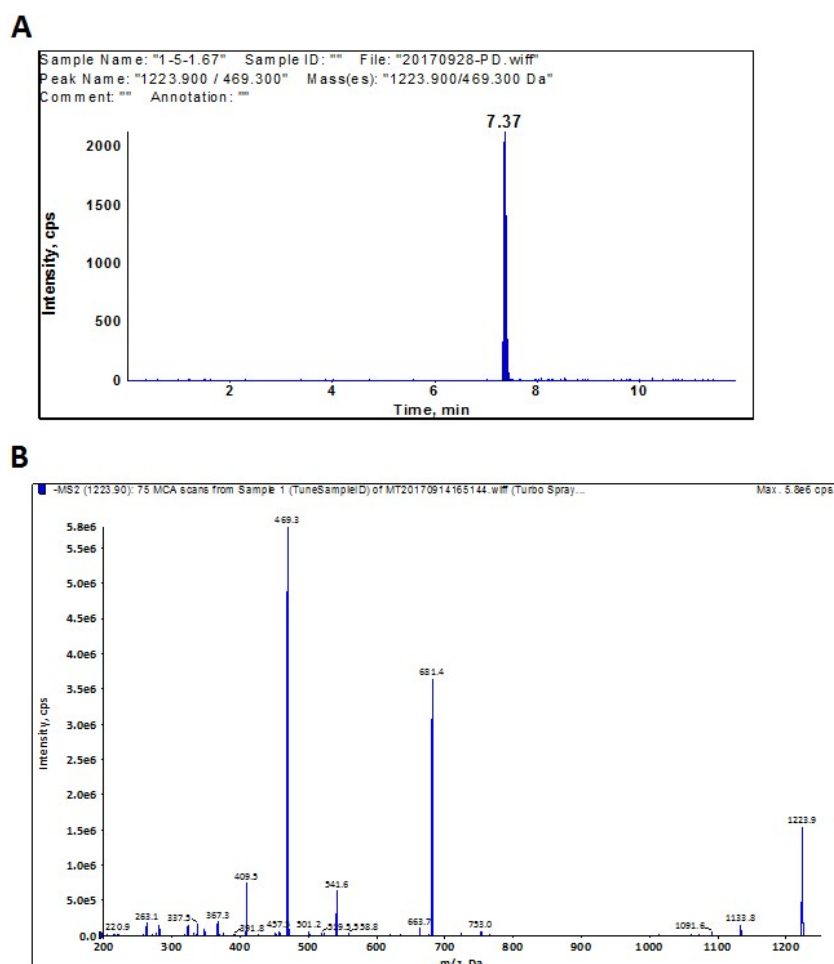

**Figure S2.** HPLC-MS/MS chromatography (**A**) and mass spectra (**B**) of PD in filtrate after direct interaction with PRRSV. Analysis of PD concentration was carried out using an Agilent 1200 series high-performance liquid chromatography (HPLC) system coupled with an Applied Biosystem API 4000 triple quadrupole mass spectrometer. Chromatographic separation was performed using an Agilent Zorbax SB-Aq C18 column (150 mm × 2.1 mm i.d., 3.5 μg/mL). The mass analysis was carried out under the negative electrospray ionization mode. The transitions of  $m/z$  1223.9→469.3 was used for quantification, and of

$m/z$  1223.9→681.5 was used for identification. (A) Total ions chromatogram of PD. (B) ESI(-) mass spectra of PD.

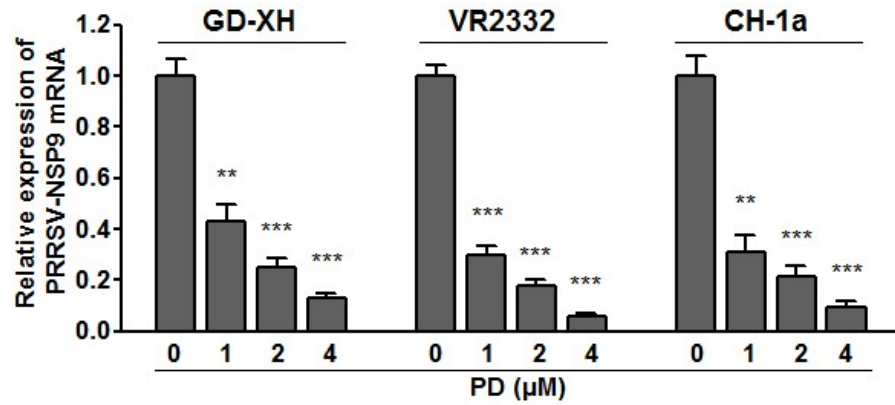

**Figure S3.** The anti-PRRSV activity of PD in PAM cultures is strain independent. PAMs grown in 6-well plates were infected with PRRSV GD-XH or VR2332 or CH-1a strain (0.5 MOI) for 2 h at 37°C and then treated with PD at various concentrations. Relative PRRSV NSP9 mRNA expression of PD treated groups to DMSO-treated control (0 μM PD) (set as 1) was analyzed using real-time RT-PCR at 24 h post PD treatment. \* $p < 0.05$ , \*\* $p < 0.01$ , and \*\*\* $p < 0.001$  compared to DMSO-treated control.
